# Supplementary material for: Psychophysiological reactivity, coping behaviour and intrusive memories upon multisensory Virtual Reality and Script-Driven Imagery analogue trauma: A randomised controlled crossover study
Source: PubMed Central journal article supplement (PMC6249992; doi:10.1016/j.janxdis.2018.08.005), 2018-10
Supplement: mmc1.pdf [file mmc1.pdf]

## Appendix A. Supplementary material

**Table A.1. Scenario-specific variables**

|                                                                                                     | Stress induction paradigm             |                                              | Test statistic              | <i>p</i> |
|-----------------------------------------------------------------------------------------------------|---------------------------------------|----------------------------------------------|-----------------------------|----------|
|                                                                                                     | Virtual Reality (VR) ( <i>n</i> = 66) | Script-Driven Imagery (SDI) ( <i>n</i> = 61) |                             |          |
| Exposure time (Min): <i>M</i> ( <i>SD</i> )                                                         | 5.47 (2.86)                           | 5.04 (2.13)                                  | <i>t</i> (122) = 0.96       | .340     |
| Stress intensity of the analogue trauma: <i>M</i> ( <i>SD</i> ) <sup>a</sup>                        | 5.02 (1.03)                           | 4.71 (1.14)                                  | <i>t</i> (118) = 1.56       | .122     |
| Stress intensity of the neutral condition: <i>M</i> ( <i>SD</i> ) <sup>a</sup>                      | 2.97 (1.39)                           | 3.09 (1.33)                                  | <i>t</i> (118) = 0.48       | .635     |
| Motivation to fully participate in the experiment (compliance): <i>M</i> ( <i>SD</i> ) <sup>a</sup> | 5.39 (0.88)                           | 5.34 (0.66)                                  | <i>t</i> (118) = 0.30       | .767     |
| Degree of immersion into the situation: <i>M</i> ( <i>SD</i> ) <sup>a</sup>                         | 4.61 (0.84)                           | 4.78 (0.90)                                  | <i>t</i> (118) = 1.03       | .306     |
| Degree of realness: <i>M</i> ( <i>SD</i> ) <sup>a</sup>                                             | 4.61 (0.78)                           | 4.36 (1.12)                                  | <i>t</i> (101) = 1.42       | .159     |
| Sense of control: <i>M</i> ( <i>SD</i> ) <sup>a</sup>                                               | 3.60 (1.36)                           | 4.03 (1.18)                                  | <i>t</i> (117) = 1.88       | .062     |
| Ability to act: <i>M</i> ( <i>SD</i> ) <sup>a</sup>                                                 | 3.90 (1.17)                           | 4.22 (1.22)                                  | <i>t</i> (118) = 1.47       | .143     |
| Need to act: <i>M</i> ( <i>SD</i> ) <sup>a</sup>                                                    | 5.42 (1.05)                           | 5.59 (0.90)                                  | <i>t</i> (118) = 0.93       | .353     |
| Perception of smell of smoke: <i>N</i> (%)                                                          | 53 (85.5)                             | 51 (87.9)                                    | $\chi^2(1, N = 120) = 0.16$ | .694     |
| Immersion facilitated by smell of smoke: <i>N</i> (%)                                               | 48 (77.4)                             | 43 (74.1)                                    | $\chi^2(1, N = 120) = 0.18$ | .675     |
| Plausibility of the cover story: <i>N</i> (%)                                                       | 51 (82.3)                             | 51 (87.9)                                    | $\chi^2(1, N = 120) = 0.76$ | .384     |
| Avoidance of the situation, <i>N</i> (%)                                                            | 9 (14.5)                              | 6 (10.3)                                     | $\chi^2(1, N = 120) = 0.48$ | .490     |
| Attentional control task (correct detail recognition): <i>N</i> (%)                                 | 55 (88.7)                             | 55 (93.2)                                    | $\chi^2(1, N = 121) = 0.74$ | .388     |

## Script-Driven Imagery

|                                                                  |   |             |
|------------------------------------------------------------------|---|-------------|
| Speed of the audio-script perceived as appropriate, <i>N</i> (%) | - | 53 (91.4)   |
| Perspective, <i>N</i> (%)                                        |   |             |
| Analogue trauma                                                  |   |             |
| Bystander/observer                                               | - | 6 (10.0)    |
| First-person-perspective                                         | - | 54 (90.0)   |
| Neutral condition                                                |   |             |
| Bystander/observer                                               | - | 7 (11.7)    |
| First-person-perspective                                         | - | 53 (88.4)   |
| Vividness, <i>M</i> ( <i>SD</i> ) <sup>a</sup>                   |   |             |
| Analogue trauma                                                  | - | 4.47 (1.08) |
| Neutral condition                                                | - | 4.37 (1.15) |

## Virtual Reality

|                                                                        |             |   |
|------------------------------------------------------------------------|-------------|---|
| Experience playing computer games: <i>M</i> ( <i>SD</i> ) <sup>a</sup> | 1.84 (1.18) | - |
| IPQ: <i>M</i> ( <i>SD</i> ) <sup>b</sup>                               |             |   |
| Sense of being there                                                   | 4.40 (1.53) | - |
| Spatial presence                                                       | 4.24 (0.86) | - |
| Involvement                                                            | 4.08 (0.79) | - |
| Experienced Realism                                                    | 4.04 (0.78) | - |
| Degree of cyber sickness: <i>M</i> ( <i>SD</i> ) <sup>a</sup>          | 1.97 (1.32) | - |

---

*Note.* IPQ = Igroup Presence Questionnaire; if it is not otherwise mentioned it refers to the experience related to the analogue trauma condition, <sup>a</sup> Likert-scale from 1 = *not at all* to 6 = *extreme*; <sup>b</sup> Likert-scale from 0 = *not at all* to 6 = *extreme*

\* $p < .05$ . \*\* $p < .01$ . \*\*\* $p < .001$ .
